# Supplementary material
Source: PubMed Central journal article supplement (PMC8773994)
Supplement: ofab429_suppl_supplementary_materials.pdf [file ofab429_suppl_supplementary_materials.pdf]

## Supplementary Information

**Supplementary Figure 1. Risk Ratios (95% CIs)\* for Outcomes Among Hospitalized Pregnant Women (A) and Women Who Delivered (B) Aged 15–24 Years by Race (COVID-19 Diagnosis vs No COVID-19 Diagnosis) April to November 2020.**

### A) Pregnant

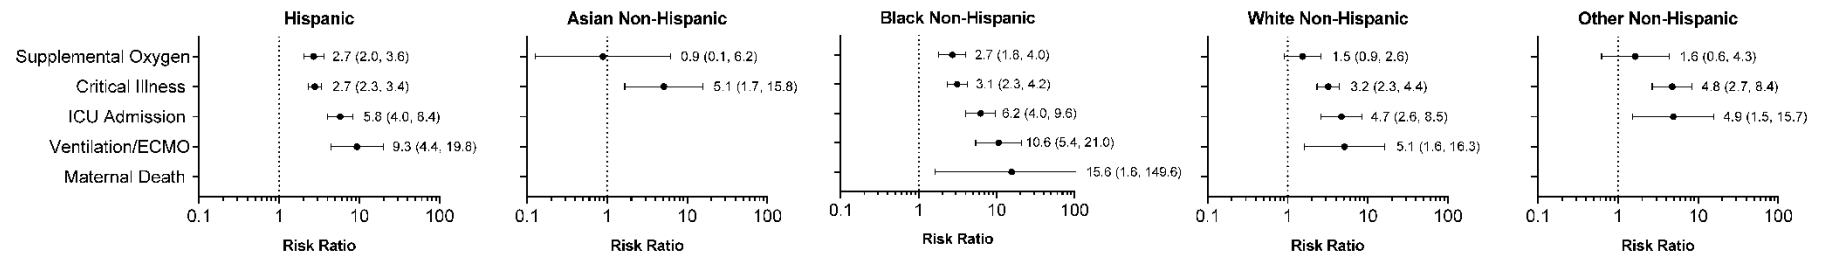

### B) Delivered

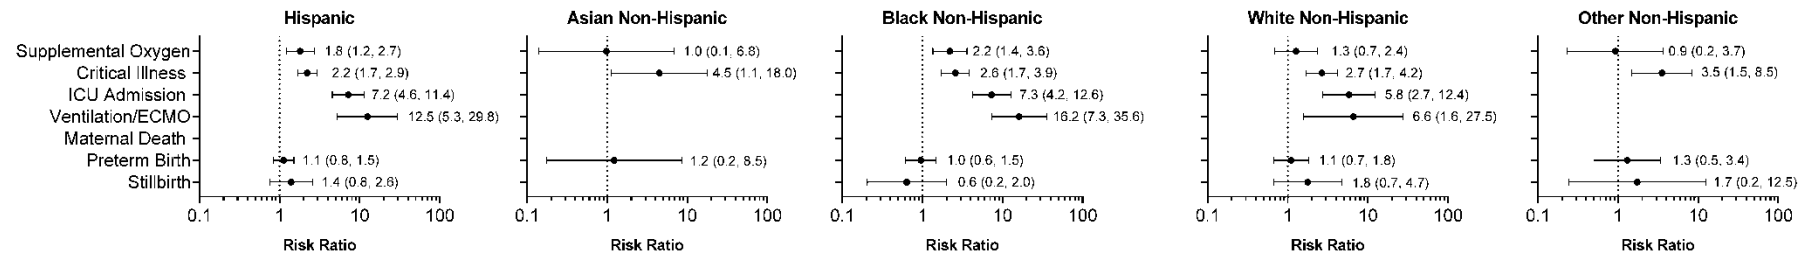

\*Risk ratios were not calculated for outcomes having a count of zero in either group (COVID-19 diagnosis vs no COVID-19 diagnosis).

Other Non-Hispanic includes Native Hawaiian and Other Pacific Islander, American Indian and Alaska Native, and Some Other race.

COVID-19=coronavirus disease 2019; ECMO=extracorporeal membrane oxygenation; ICU= intensive care unit.

**Supplementary Figure 2. Risk Ratios (95% CIs)\* for Outcomes Among Hospitalized Pregnant Women (A) and Women Who Delivered (B) Aged 25–34 Years by Race (COVID-19 Diagnosis vs No COVID-19 Diagnosis) April to November 2020.**

**A) Pregnant**

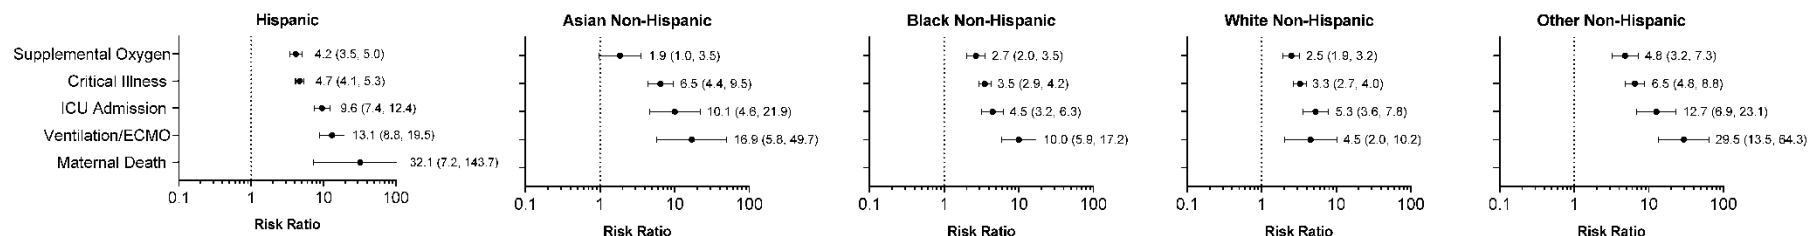

**B) Delivered**

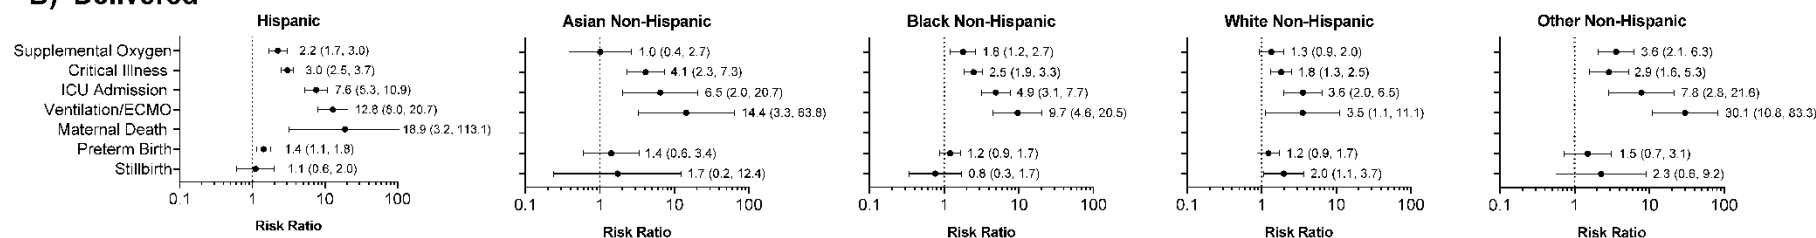

\*Risk ratios were not calculated for outcomes having a count of zero in either group (COVID-19 diagnosis vs no COVID-19 diagnosis).

Other Non-Hispanic includes Native Hawaiian and Other Pacific Islander, American Indian and Alaska Native, and Some Other race.

COVID-19=coronavirus disease 2019; ECMO=extracorporeal membrane oxygenation; ICU= intensive care unit.

**Supplementary Figure 3. Risk Ratios (95% CIs)\* for Outcomes Among Hospitalized Pregnant Women (A) and Women Who Delivered (B) Aged 35–44 Years by Race (COVID-19 Diagnosis versus No COVID-19 Diagnosis) April to November 2020.**

**A) Pregnant**

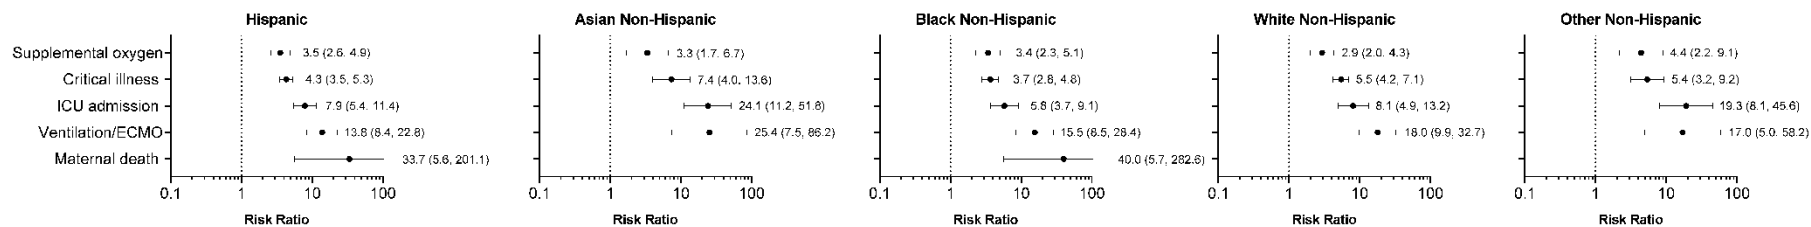

**B) Delivered**

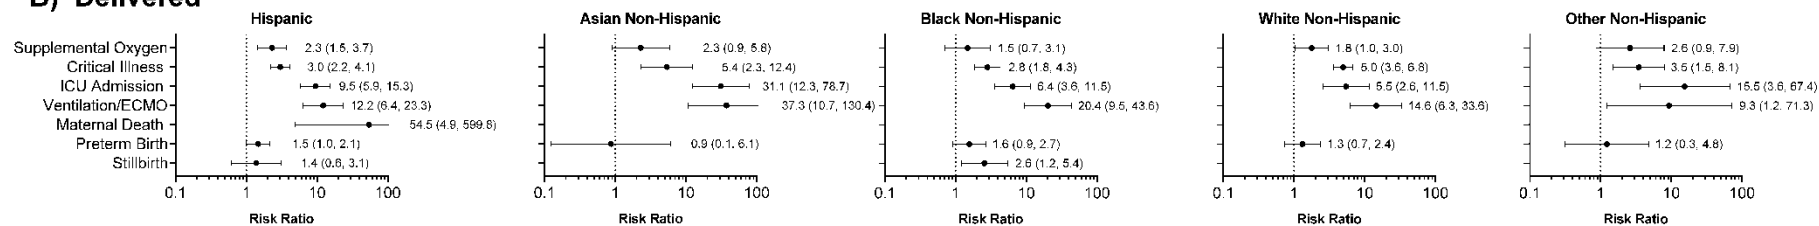

\*Risk ratios were not calculated for outcomes having a count of zero in either group (COVID-19 diagnosis vs no COVID-19 diagnosis). Other Non-Hispanic includes Native Hawaiian and Other Pacific Islander, American Indian and Alaska Native, and Some Other race.

COVID-19=coronavirus disease 2019; ECMO=extracorporeal membrane oxygenation; ICU= intensive care unit.
